# Supplementary material for: Pathogenesis of Primary Foot-and-Mouth Disease Virus Infection in the Nasopharynx of Vaccinated and Non-Vaccinated Cattle
Source: PubMed Central journal article supplement (PMC4658095; doi:10.1371/journal.pone.0143666), 2015-11-23
Supplement: pone.0143666.s001.pdf [file pone.0143666.s001.pdf]

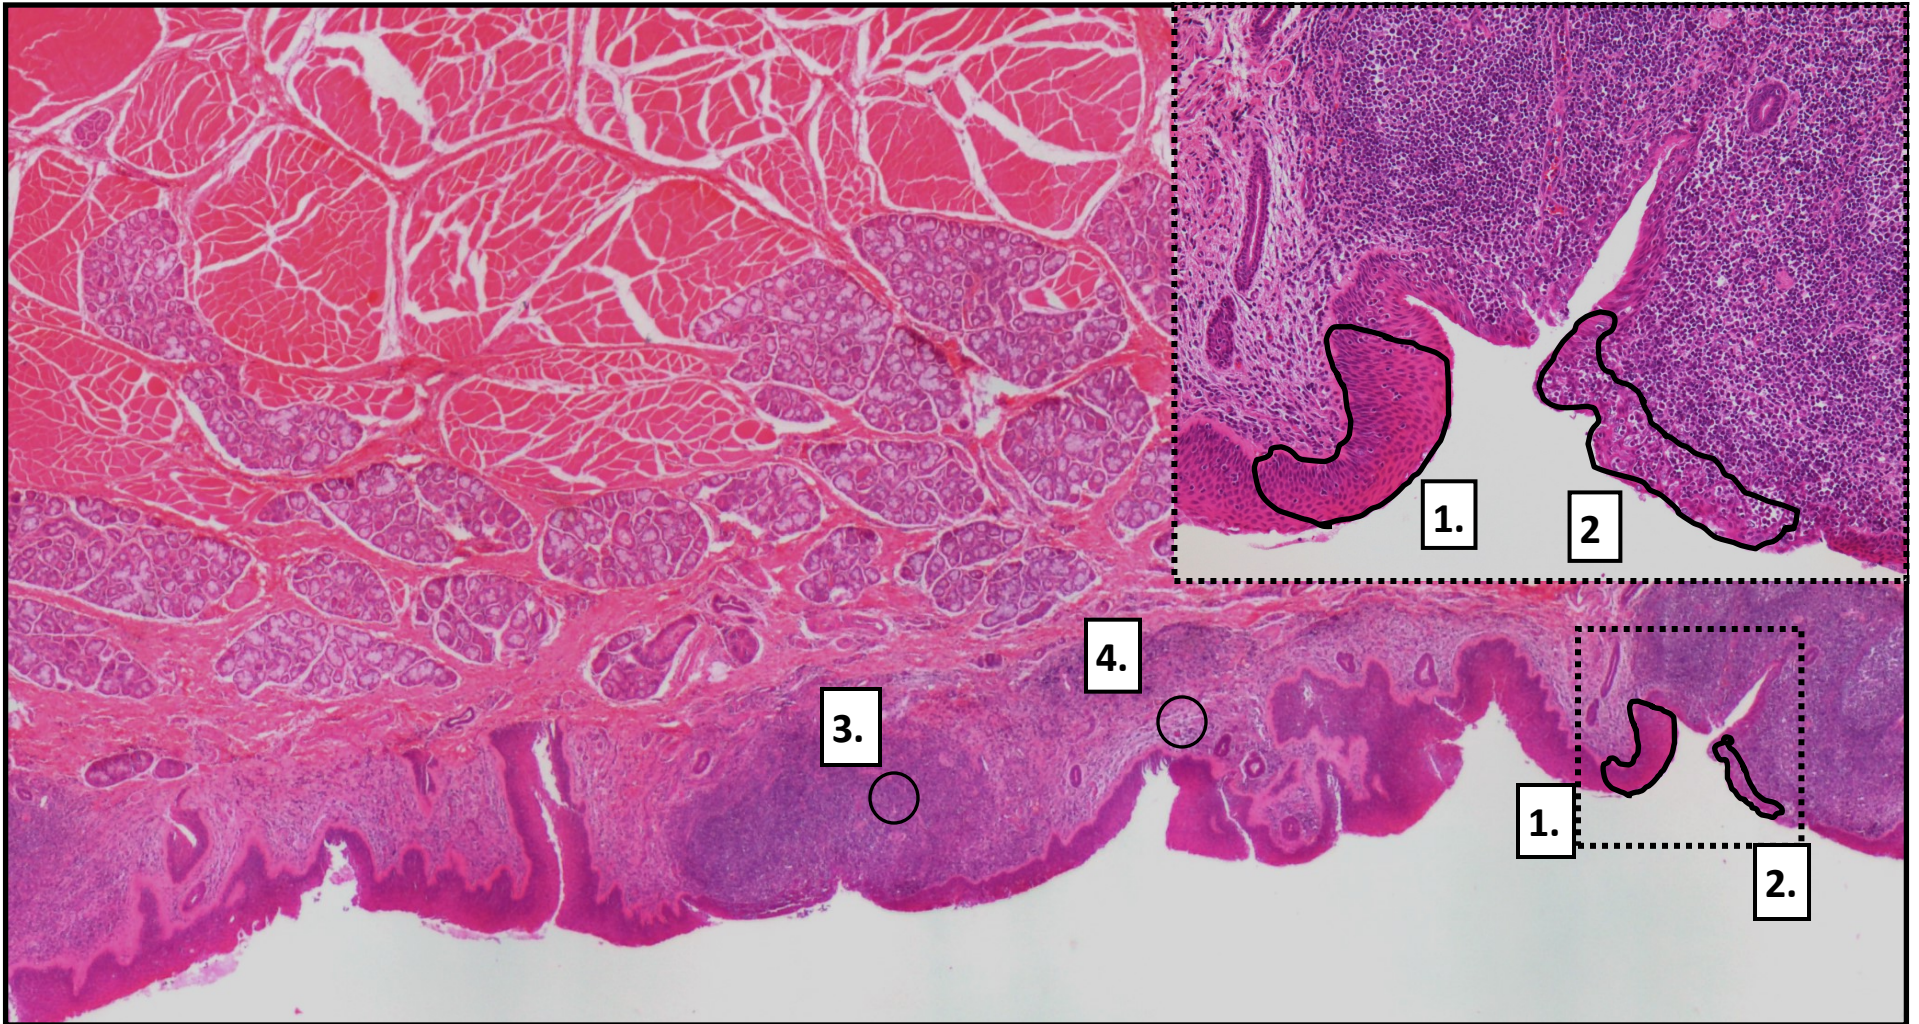

S1 Fig: Histologic specimen of bovine dorsal nasopharyngeal mucosa identifying four distinct micro-anatomic regions isolated by laser capture microdissection. (1): **Non-lymphoid epithelium**, (2): **Follicle associated epithelium**, (3): **Sub-epithelial MALT follicles**, (4): **Submucosa**. 10x magnification, Hematoxylin and Eosin stain. Inset: 20x magnification of area within hatched square.
