# Supplementary material for: Pathogenesis of Primary Foot-and-Mouth Disease Virus Infection in the Nasopharynx of Vaccinated and Non-Vaccinated Cattle
Source: PubMed Central journal article supplement (PMC4658095; doi:10.1371/journal.pone.0143666), 2015-11-23
Supplement: pone.0143666.s002.pdf [file pone.0143666.s002.pdf]

## S1 Table

FMDV RNA quantities ( $\log_{10}$  genome copy number [GCN]/ml) in nasal- and oral swabs and serum from non-vaccinated and vaccinated cattle. Neg= below limit of detection (1.57  $\log_{10}$  GCN/ml). NA=sample not collected. '-'=Animal euthanized prior to this time point. 'post inoc.'=samples collected directly after inoculation

| <b>Non-Vaccinated Category I (pre-viremic/pre-clinical at time of euthanasia)</b> |             |                  |            |      |      |      |      |      |      |       |       |
|-----------------------------------------------------------------------------------|-------------|------------------|------------|------|------|------|------|------|------|-------|-------|
| Animal ID                                                                         | Sample type | Time point (hpi) |            |      |      |      |      |      |      |       |       |
|                                                                                   |             | 0                | post inoc. | 4    | 6    | 8    | 10   | 12   | 24   | 48    | 72    |
| 1                                                                                 | Nasal swab  | Neg              | 5.34       | 6.11 | 4.87 | 3.44 | 3.76 | 4.54 | -    | -     | -     |
|                                                                                   | Oral swab   | Neg              | 5.22       | 5.19 | 3.27 | 4.20 | 3.06 | 3.21 | -    | -     | -     |
|                                                                                   | Serum       | Neg              | NA         | NA   | NA   | NA   | NA   | Neg  | -    | -     | -     |
| 2                                                                                 | Nasal swab  | Neg              | 7.81       | 5.90 | 3.79 | 3.34 | 3.66 | 3.93 | -    | -     | -     |
|                                                                                   | Oral swab   | Neg              | 5.53       | 5.42 | 3.48 | 3.34 | 3.20 | 3.60 | -    | -     | -     |
|                                                                                   | Serum       | Neg              | NA         | NA   | NA   | NA   | NA   | Neg  | -    | -     | -     |
| 3                                                                                 | Nasal swab  | Neg              | 5.72       | NA   | NA   | NA   | NA   | NA   | 4.89 | -     | -     |
|                                                                                   | Oral swab   | Neg              | 5.86       | NA   | NA   | NA   | NA   | NA   | 2.96 | -     | -     |
|                                                                                   | Serum       | Neg              | NA         | NA   | NA   | NA   | NA   | NA   | Neg  | -     | -     |
| 4                                                                                 | Nasal swab  | Neg              | 6.65       | NA   | NA   | NA   | NA   | NA   | 5.79 | 6.63  | -     |
|                                                                                   | Oral swab   | Neg              | 3.47       | NA   | NA   | NA   | NA   | NA   | 3.62 | 4.11  | -     |
|                                                                                   | Serum       | Neg              | NA         | NA   | NA   | NA   | NA   | NA   | Neg  | 2.61* | -     |
| 5                                                                                 | Nasal swab  | Neg              | 5.65       | NA   | NA   | NA   | NA   | NA   | 4.48 | 5.01  | 6.59  |
|                                                                                   | Oral swab   | Neg              | 5.23       | NA   | NA   | NA   | NA   | NA   | 3.35 | 3.61  | 6.91  |
|                                                                                   | Serum       | Neg              | NA         | NA   | NA   | NA   | NA   | NA   | Neg  | Neg   | 3.35* |

\*Serum samples positive by qRT-PCR but negative by virus isolation

| <b>Non-Vaccinated Category II (viremic/pre-clinical at time of euthanasia)</b> |             |                  |            |      |      |      |      |
|--------------------------------------------------------------------------------|-------------|------------------|------------|------|------|------|------|
| Animal ID                                                                      | Sample type | Time point (hpi) |            |      |      |      |      |
|                                                                                |             | 0                | post inoc. | 24   | 48   | 72   | 96   |
| 6                                                                              | Nasal swab  | Neg              | 6.71       | 4.52 | 5.49 | 6.83 | 6.82 |
|                                                                                | Oral swab   | Neg              | 5.39       | 3.25 | 4.91 | 5.33 | 7.01 |
|                                                                                | Serum       | Neg              | NA         | Neg  | Neg  | Neg  | 3.37 |
| 7                                                                              | Nasal swab  | Neg              | 6.86       | 5.58 | -    | -    | -    |
|                                                                                | Oral swab   | Neg              | 6.13       | 3.37 | -    | -    | -    |
|                                                                                | Serum       | Neg              | NA         | 3.46 | -    | -    | -    |

**Non-Vaccinated Category III (viremic/clinical at time of euthanasia)**

| Animal ID | Sample type | Time point (hpi) |                   |      |      |       |      |
|-----------|-------------|------------------|-------------------|------|------|-------|------|
|           |             | 0                | <i>post inoc.</i> | 24   | 48   | 72    | 96   |
| 8         | Nasal swab  | Neg              | 8.03              | 5.43 | 3.90 | -     | -    |
|           | Oral swab   | Neg              | 5.90              | 4.83 | 6.69 | -     | -    |
|           | Serum       | Neg              | NA                | 3.34 | 5.95 | -     | -    |
| 9         | Nasal swab  | Neg              | 6.03              | Neg  | 4.45 | 8.30  | -    |
|           | Oral swab   | Neg              | 4.26              | Neg  | 4.50 | 11.02 | -    |
|           | Serum       | Neg              | NA                | Neg  | 6.20 | 7.94  | -    |
| 10        | Nasal swab  | Neg              | 6.51              | 5.52 | 5.84 | 7.24  | 7.02 |
|           | Oral swab   | Neg              | 7.27              | 5.34 | 6.24 | 9.05  | 8.65 |
|           | Serum       | Neg              | NA                | 3.97 | 6.69 | 7.89  | 8.37 |

**Vaccinated Cattle**

| Animal ID | Sample type | Time point (hpi) |                   |      |     |     |
|-----------|-------------|------------------|-------------------|------|-----|-----|
|           |             | 0                | <i>post inoc.</i> | 24   | 48  | 72  |
| 11        | Nasal swab  | Neg              | 6.36              | 5.46 | -   | -   |
|           | Oral swab   | Neg              | 5.08              | 5.21 | -   | -   |
|           | Serum       | Neg              | NA                | Neg  | -   | -   |
| 12        | Nasal swab  | Neg              | 6.66              | 3.45 | -   | -   |
|           | Oral swab   | Neg              | 5.14              | Neg  | -   | -   |
|           | Serum       | Neg              | NA                | Neg  | -   | -   |
| 13        | Nasal swab  | Neg              | 5.91              | Neg  | Neg | -   |
|           | Oral swab   | Neg              | 5.11              | Neg  | Neg | -   |
|           | Serum       | Neg              | NA                | Neg  | Neg | -   |
| 14        | Nasal swab  | Neg              | 6.37              | Neg  | Neg | -   |
|           | Oral swab   | Neg              | 5.03              | Neg  | Neg | -   |
|           | Serum       | Neg              | NA                | Neg  | Neg | -   |
| 15        | Nasal swab  | Neg              | 6.60              | 4.82 | Neg | Neg |
|           | Oral swab   | Neg              | Neg               | 4.56 | Neg | Neg |
|           | Serum       | Neg              | NA                | Neg  | Neg | Neg |
| 16        | Nasal swab  | Neg              | 6.95              | 3.30 | Neg | Neg |
|           | Oral swab   | Neg              | 5.69              | Neg  | Neg | Neg |
|           | Serum       | Neg              | NA                | Neg  | Neg | Neg |
